# Supplementary material for: Oral treatment with Lactobacillus rhamnosus attenuates behavioural deficits and immune changes in chronic social stress
Source: PubMed Central journal article supplement (PMC5225647; doi:10.1186/s12916-016-0771-7), 2017-01-11

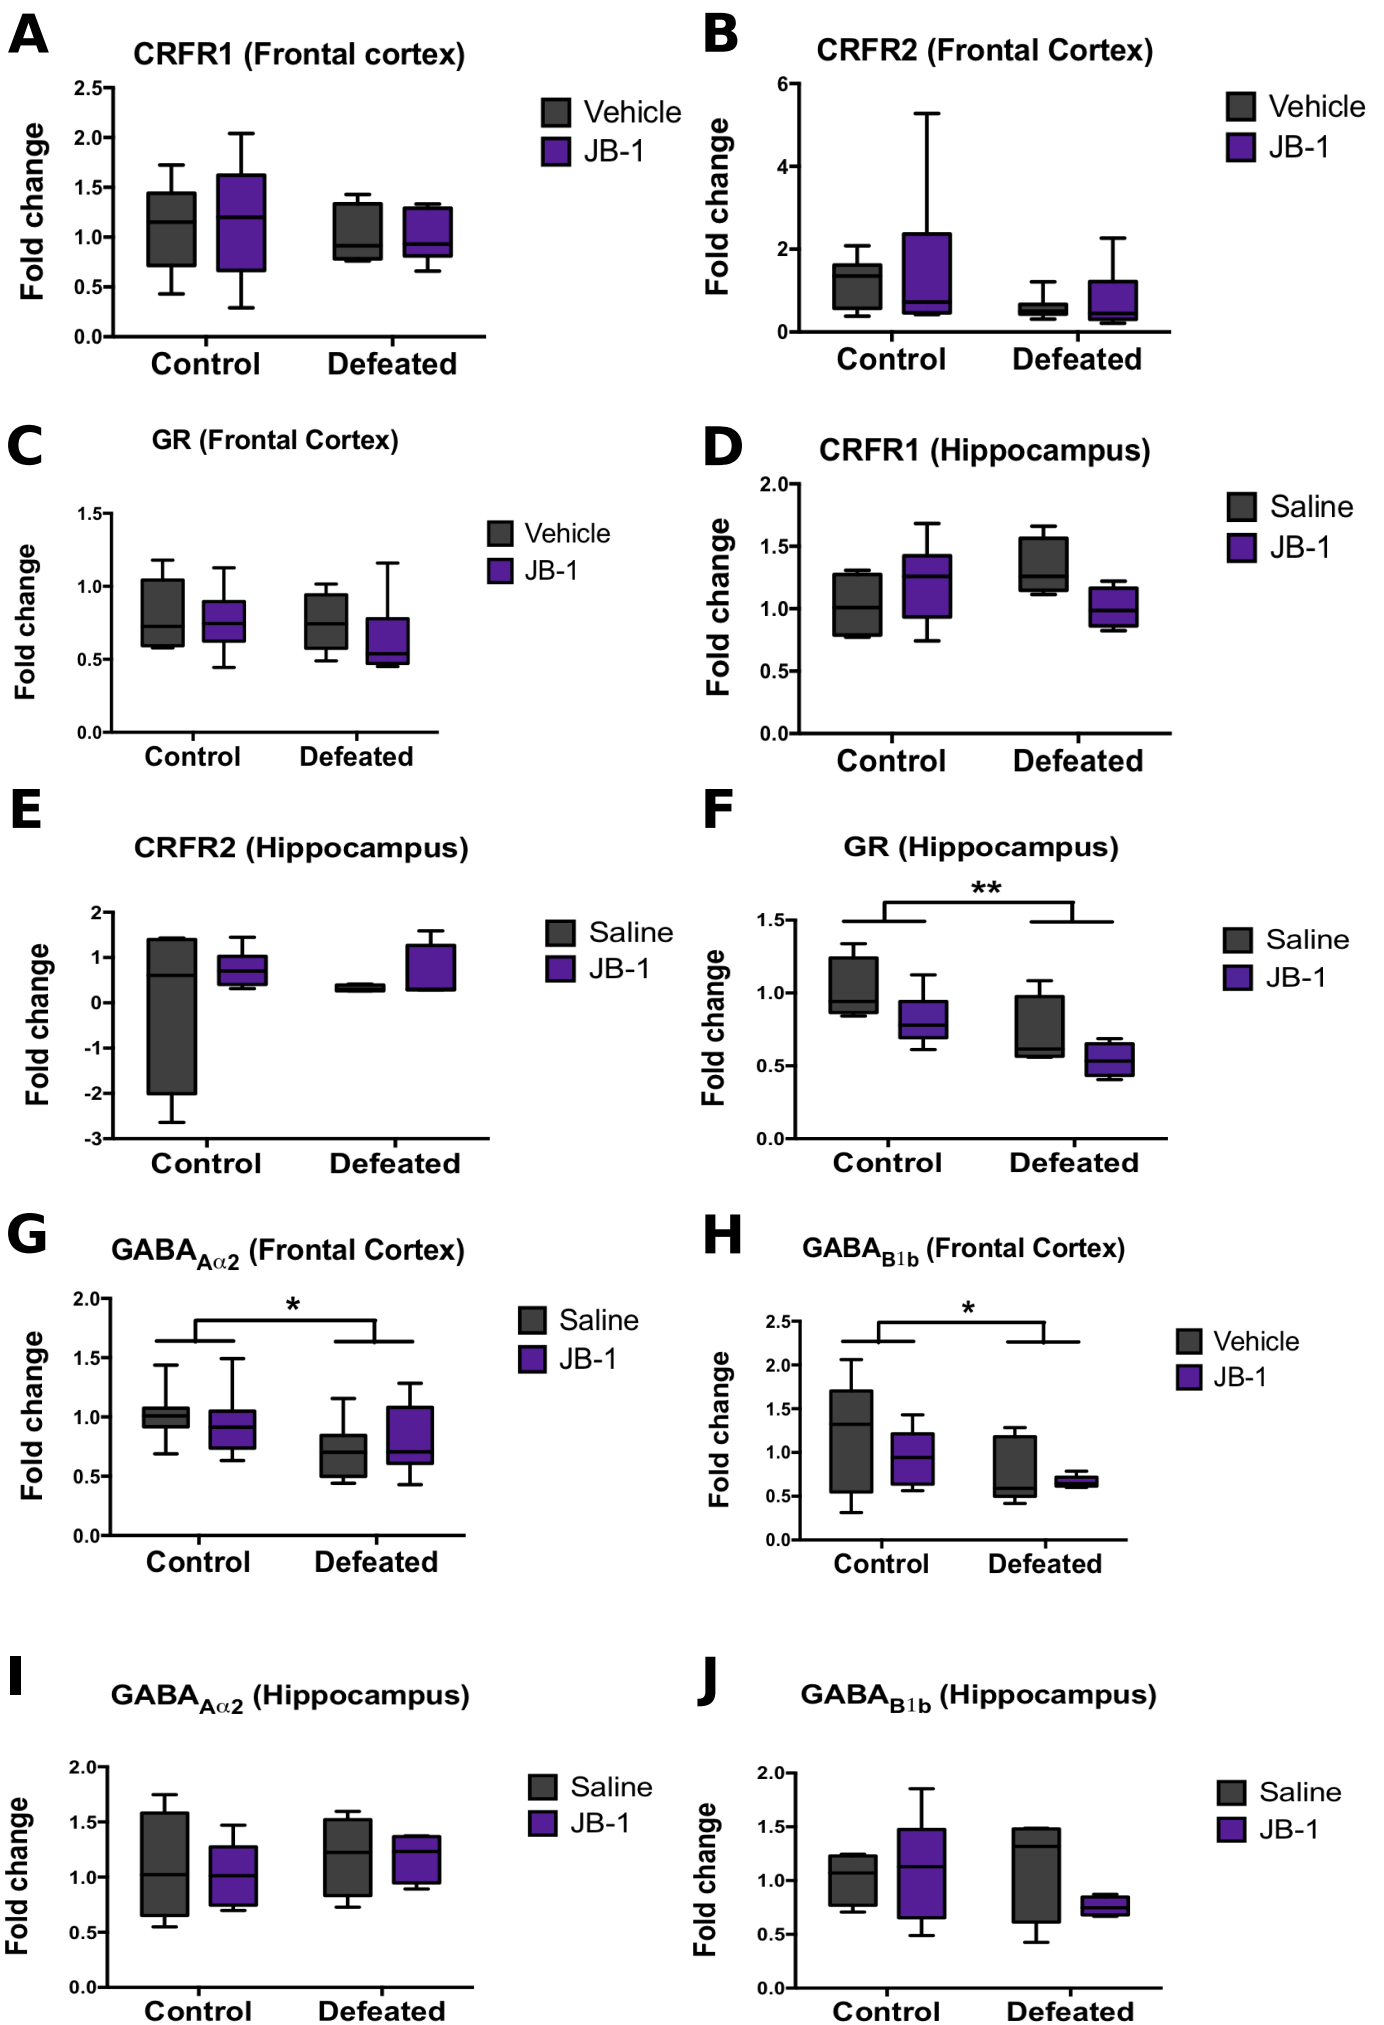

Supplement: 12916_2016_771_MOESM4_ESM.pdf [file 12916_2016_771_MOESM4_ESM.pdf]
