# Supplementary material for: Oral treatment with Lactobacillus rhamnosus attenuates behavioural deficits and immune changes in chronic social stress
Source: BMC Med. 2017 Jan 11;15:7. doi: 10.1186/s12916-016-0771-7 (PMC5225647; doi:10.1186/s12916-016-0771-7)
Supplement: Additional file 2: Supplementary Tables: Table S1. — Statistical comparisons of Bray-Curtis distances between a priori groupings. Related to Figure 4. Table S2. discriminatory OTUs between undefeated vehicle- and JB-1-treated controls, and vehicle- and JB-1-treated defeated mice. Related to Figure 4. Table S3. fecal metabolites altered in response to stress. Table S4. Main effect of L. rhamnosus (JB-1) treatment on fecal metabolites. Table S5. fecal metabolites altered by stress (DEF/VEH vs CON/VEH) but unaffected in DEF/JB-1 vs CON/VEH. Related to Figure 5. Table S6. Primer sequences used for real time quantitative PCR. Related to Figure S2. (XLSX 83 kb) [file 12916_2016_771_MOESM2_ESM.xlsx]

## Sheet: Table S1
Table S1. Statistical comparisons of Bray-Curtis distances between a priori groupings. Related to Figure 4.
24 hours following CSD cessation:
Intra-group Distance	Inter-group Distance	Non-parametric p-value (Bonferroni-corrected)
CON/VEH vs. CON/VEH	CON/VEH vs.DEF/VEH	0.013
CON/VEH vs. CON/VEH	CON/VEH vs. CON/JB-1	p > 0.05
CON/VEH vs. CON/VEH	CON/VEH vs. DEF/JB-1	0.013
DEF/VEH vs. DEF/VEH	DEF/VEH vs. DEF/JB-1	p > 0.05
CON/JB-1 vs. CON/JB-1	CON/JB-1 vs. DEF/JB-1	0.013
3 weeks following CSD cessation:
Intra-group Distance	Inter-group Distance	Non-parametric p-value (Bonferroni-corrected)
CON/VEH vs. CON/VEH	CON/VEH vs.DEF/VEH	0.022
CON/VEH vs. CON/VEH	CON/VEH vs. DEF/JB-1	p > 0.05
DEF/VEH vs. DEF/VEH	DEF/VEH vs. DEF/JB-1	p > 0.05
DEF/JB-1 vs. DEF/JB-1	DEF/JB-1 vs. DEF/VEH	p > 0.05
CON/VEH vs. DEF/JB-1	CON/VEH vs. DEF/VEH	p > 0.05
Jackknife resampling was used to generate Bray-Curtis distances. (Dis)similarity between the microbiota profiles was assessed by comparing intra-group distances to inter-group distances using the Monte Carlo Permutation Procedure (MCPP) (999 permutations) and Bonferroni-corrected non-parametric t-tests. Null hypothesis: intra-group distances = inter-group distances. See Experimental Procedures fo…

## Sheet: Table S2
Table S2. Discriminatory OTUs between undefeated vehicle- and JB-1-treated controls, and vehicle- and JB-1-treated defeated mice. Related to Figure 4.
OTU	Kruskal-Wallis Test Statistic	p-value	q-value (FDR)	Taxonomic Assignment
400	28.8535	2.4e-06	0.000469867	Bacteroidetes|Bacteroidia|Bacteroidales|Prevotellaceae|Prevotella
309	27.4775	4.67e-06	0.000469867	Bacteroidetes|Bacteroidia|Bacteroidales
106	27.4252	4.79e-06	0.000469867	Bacteroidetes|Bacteroidia|Bacteroidales|Prevotellaceae|Prevotella
61	25.631	1.14e-05	0.000837442	Bacteroidetes|Bacteroidia|Bacteroidales
4	24.2872	2.18e-05	0.00127936	Bacteroidetes|Bacteroidia|Bacteroidales|Prevotellaceae|Prevotella
119	23.1168	3.82e-05	0.00185414	Bacteroidetes|Bacteroidia|Bacteroidales|Prevotellaceae|Prevotella
43	22.8143	4.41e-05	0.00185414	Firmicutes|Clostridia|Clostridiales|Ruminococcaceae|Ruminococcus
17	18.9638	0.000278148	0.0102219	Bacteroidetes|Bacteroidia|Bacteroidales
20	18.5818	0.00033359	0.0108973	Firmicutes|Bacilli|Lactobacillales|Lactobacillaceae|Lactobacillus
29	17.3076	0.000610914	0.0171188	Bacteroidetes|Bacteroidia|Bacteroidales
171	17.2078	0.000640498	0.0171188	Firmicutes|Clostridia|Clostridiales
87	16.8317	0.000765376	0.0187517	Firmicutes|Clostridia|Clostridiales|Ruminococcaceae|Ruminococcus
337	16.4105	0.000934073	0.0209111	Bacteroidetes|Bacteroidia|Bacteroidales
89	16.2752	0.000995768	0.0209111	Proteobacteria|Alphaproteobacteria
18	16.0133	0.0011269	0.0216725	Bacteroidetes|Bacteroidia|Bacteroidales
45	15.9167	0.00117946	0.0216725	Bacteroidetes|Bacteroidia|Bacteroidales
63	15.1443	0.00169737	0.0293545	Firmicutes|Clostridia|Clostridiales|Ruminococcaceae|Oscillospira
222	14.3605	0.00245334	0.0400712	Firmicutes|Clostridia|Clostridiales|Lachnospiraceae|Clostridium
Discriminatory OTUs between the groups in the Kruskal-Wallis analysis (FDR <0.05). Green indicates a main effect of stress only. Blue indicates an additional main effect of treatment as well as a significant difference between vehicle- and JB-1 treated unstressed animals in post-hoc analysis (p< 0.05). Post-hoc analysis on each of the discriminatory OTUs revealed a main effect of stress (p <0.05)…

## Sheet: Table S3
Table S3. Fecal metabolites altered in response to stress.
Super Pathway	Sub-pathway	Metabolite	Fold Change	p-value	q-value
Amino Acid	Glutamate Metabolism	Pyroglutamine	0.28	0.0081	0.0554
Amino Acid	Histidine Metabolism	1-methylhistidine	0.07	0.0002	0.0057
Amino Acid	Lysine Metabolism	Glutarate (pentanedioate)	1.94	0.004	0.0383
Amino Acid	Lysine Metabolism	N2,N6-diacetyllysine	0.47	0.0043	0.0392
Amino Acid	Phenylalanine and Tyrosine Metabolism	Phenylacetylglycine	0.07	1.65e-05	0.0029
Amino Acid	Phenylalanine and Tyrosine Metabolism	4-hydroxycinnamate	0.65	0.0022	0.031
Amino Acid	Phenylalanine and Tyrosine Metabolism	Tyramine	0.49	0.0099	0.0631
Amino Acid	Phenylalanine and Tyrosine Metabolism	Phenol Sulfate	0.1	0.0048	0.04
Amino Acid	Phenylalanine and Tyrosine Metabolism	p-cresol sulfate	0.29	0.0024	0.0315
Amino Acid	Phenylalanine and Tyrosine Metabolism	Phenylpropionylglycine	0.06	1.0161e-05	0.0029
Amino Acid	Phenylalanine and Tyrosine Metabolism	3-(3-hydroxyphenyl)propionate sulfate	0.16	0.0105	0.0655
Amino Acid	Phenylalanine and Tyrosine Metabolism	2-hydroxyphenylacetate	0.34	0.0047	0.0399
Amino Acid	Phenylalanine and Tyrosine Metabolism	N-formylphenylalanine	1.99	4.158e-05	0.0034
Amino Acid	Tryptophan Metabolism	3-indoxyl sulfate	0.09	0.0001	0.0049
Amino Acid	Tryptophan Metabolism	Kynurenine	1.48	0.0034	0.0364
Amino Acid	Tryptophan Metabolism	Xanthurenate	0.23	0.0146	0.0806
Amino Acid	Tryptophan Metabolism	5-hydroxyindoleacetate	0.48	0.0121	0.0694
Amino Acid	Leucine, Isoleucine and Valine Metabolism	isovalerylglycine	0.0706188	0.0001	0.0041
Amino Acid	Leucine, Isoleucine and Valine Metabolism	3-methylcrotonylglycine	0.0778295	5.3289e-05	0.0034
Amino Acid	Leucine, Isoleucine and Valine Metabolism	beta-hydroxyisovaleroylcarnitine	0.534291	0.0109	0.0672
Amino Acid	Methionine, Cysteine, SAM and Taurine Metabolism	N-acetylcysteine	0.26942	0.0081	0.0554
Amino Acid	Urea cycle; Arginine and Proline Metabolism	Urea	0.10925	0.004	0.0383
Amino Acid	Urea cycle; Arginine and Proline Metabolism	N-acetylcitrulline	0.1942	0.0122	0.0694
Amino Acid	Creatine Metabolism	Guanidinoacetate	0.128631	0.0119	0.0694
Amino Acid	Guanidino and Acetamido Metabolism	Guanidinosuccinate	0.179634	0.0032	0.0356
Carbohydrate	Glycolysis, Gluconeogenesis, and Pyruvate Metabolism	glycerate	1.48616	0.0112	0.0676
Carbohydrate	Disaccharides and Oligosaccharides	Lactobionate	4.1332	0.0078	0.0554
Lipid	Fatty Acid Metabolism (BCAA Metabolism)	butyrylglycine	0.0877095	0.0027	0.0325
Lipid	Fatty Acid Metabolism (BCAA Metabolism)	propionylglycine	0.123862	0.0052	0.042
Lipid	Fatty Acid Metabolism(Acyl Glycine)	valerylglycine	0.143774	0.001	0.0177
Lipid	Fatty Acid Metabolism(Acyl Glycine)	hexanoylglycine	0.017263	2.2879e-05	0.0029
Lipid	Fatty Acid Metabolism(Acyl Carnitine)	3-hydroxybutyrylcarnitine (2)	0.448778	0.0089	0.0588
Lipid	Fatty Acid Metabolism(Acyl Carnitine)	hexanoylcarnitine	0.594716	0.006	0.0476
Lipid	Carnitine Metabolism	carnitine	0.247896	0.0037	0.0382
Lipid	Fatty Acid, Monohydroxy	4-hydroxybutyrate (GHB)	2.37033	0.0075	0.0548
Lipid	Fatty Acid, Monohydroxy	10-hydroxystearate	0.539776	0.0169	0.0919
Lipid	Phospholipid Metabolism	glycerophosphorylcholine (GPC)	2.41129	0.0073	0.0548
Lipid	Phospholipid Metabolism	trimethylamine N-oxide	0.346195	0.0079	0.0554
Lipid	Phospholipid Metabolism	1-stearoyl-2-linoleoyl-GPE (18:0/18:2)	2.69751	0.0003	0.0082
Lipid	Phospholipid Metabolism	1-palmitoyl-2-stearoyl-GPC (16:0/18:0)	1.84068	0.012	0.0694
Lipid	Lysolipid	2-stearoyl-GPE (18:0)	1.95654	0.0047	0.0399
Lipid	Monoacylglycerol	2-palmitoylglycerol (16:0)	1.46661	0.0083	0.0558
Lipid	Monoacylglycerol	1-linolenoylglycerol (18:3)	1.73643	0.0011	0.0177
Lipid	Monoacylglycerol	1-docosahexaenoylglycerol (22:6)	1.44256	0.0043	0.0392
Lipid	Sphingolipid Metabolism	stearoyl sphingomyelin (d18:1/18:0)	2.08002	0.001	0.0174
Lipid	Sphingolipid Metabolism	sphingomyelin (d18:1/24:1, d18:2/24:0)*	2.7486	0.0008	0.0168
Lipid	Sphingolipid Metabolism	behenoyl sphingomyelin (d18:1/22:0)	2.33646	0.004	0.0383
Lipid	Sphingolipid Metabolism	sphingomyelin (d18:1/20:0, d16:1/22:0)*	3.45074	0.0002	0.0061
Lipid	Primary Bile Acid Metabolism	alpha-muricholate	0.501677	0.0131	0.0735
Lipid	Primary Bile Acid Metabolism	tauro-beta-muricholate	2.85292	0.0075	0.0548
Lipid	Primary Bile Acid Metabolism	cholate sulfate	0.417433	0.0003	0.0082
Lipid	Secondary Bile Acid Metabolism	deoxycholate	0.390952	0.0072	0.0548
Lipid	Secondary Bile Acid Metabolism	lithocholate	0.499162	0.0011	0.0181
Lipid	Secondary Bile Acid Metabolism	hyodeoxycholate	0.49109	0.0098	0.0631
Nucleotide	Purine Metabolism, (Hypo)Xanthine/Inosine containing	allantoin	0.106093	0.0003	0.0082
Nucleotide	Pyrimidine Metabolism, Uracil containing	3-ureidopropionate	0.155481	0.0021	0.031
Cofactors and Vitamins	Nicotinate and Nicotinamide Metabolism	quinolinate	0.658483	0.0025	0.0315
Cofactors and Vitamins	Nicotinate and Nicotinamide Metabolism	1-methylnicotinamide	0.0797685	0.0033	0.0356
Cofactors and Vitamins	Ascorbate and Aldarate Metabolism	gulonic acid	0.144537	0.0026	0.0324
Xenobiotics	Benzoate Metabolism	hippurate	0.0785805	4.4279e-05	0.0034
Xenobiotics	Benzoate Metabolism	2-hydroxyhippurate (VEHicylurate)	0.132789	8.0363e-05	0.0037
Xenobiotics	Benzoate Metabolism	catechol sulfate	0.0985477	0.0009	0.0173
Xenobiotics	Benzoate Metabolism	4-methylcatechol sulfate	0.160204	0.0047	0.0399
Xenobiotics	Benzoate Metabolism	4-ethylphenylsulfate	0.0964254	0.0009	0.0173
Xenobiotics	Food Component/Plant	gluconate	2.19136	0.0028	0.0325
Xenobiotics	Food Component/Plant	cinnamoylglycine	0.0602523	8.7172e-05	0.0037
Xenobiotics	Food Component/Plant	equol sulfate	0.253894	0.0023	0.031
Xenobiotics	Chemical	1-(3-aminopropyl)-2-pyrrolidone	0.427076	0.0004	0.0086
Xenobiotics	Chemical	2-aminophenol sulfate	0.185023	0.0022	0.031
Xenobiotics	Chemical	S-(3-hydroxypropyl)mercapturic acid (HPMA)	0.163123	8.3435e-05	0.0037
Summary of fecal metabolites levels in VEH-treated defeated mice versus controls.Samples were analyzed using GC/LC-MS by Metabolon, Inc. Data were analyzed using two-way ANOVA with contrasts, followed by the Benjamini-Hochberg correction for multiple comparisons (FDR < 0.1). Additional details are provided in Experimental Procedures.

## Sheet: Table S4
Table S4. Main effect of L. rhamnosus (JB-1) treatment on fecal metabolites.
Super Pathway	Sub-pathway	Metabolite	Fold Change
Amino Acid	Glycine, Serine and Threonine Metabolism	dimethylglycine	0.528466
Amino Acid	Glycine, Serine and Threonine Metabolism	O-acetylhomoserine	2.04811
Amino Acid	Lysine Metabolism	6-oxopiperidine-2-carboxylic acid	0.785056
Amino Acid	Phenylalanine and Tyrosine Metabolism	3-(4-hydroxyphenyl)propionate	0.775087
Amino Acid	Methionine, Cysteine, SAM and Taurine Metabolism	4-methylthio-2-oxobutanoate	0.739966
Carbohydrate	Pentose Metabolism	ribose	0.932082
Carbohydrate	Disaccharides and Oligosaccharides	lactobionate	0.700898
Carbohydrate	Fructose, Mannose and Galactose Metabolism	mannitol/sorbitol	0.926303
Carbohydrate	Aminosugar Metabolism	diacetylchitobiose	1.64491
Carbohydrate	Aminosugar Metabolism	N-acetylmuramate	0.709767
Lipid	Medium Chain Fatty Acid	caproate (6:0)	2.17711
Lipid	Medium Chain Fatty Acid	heptanoate (7:0)	1.01904
Lipid	Long Chain Fatty Acid	behenate (22:0)*	0.991122
Lipid	Polyunsaturated Fatty Acid (n3 and n6)	docosapentaenoate (n3 DPA; 22:5n3)	1.34525
Lipid	Polyunsaturated Fatty Acid (n3 and n6)	dihomo-linolenate (20:3n3 or n6)	1.48905
Lipid	Polyunsaturated Fatty Acid (n3 and n6)	arachidonate (20:4n6)	1.28704
Lipid	Fatty Acid, Branched	13-methylmyristate	1.07222
Lipid	Fatty Acid, Keto	1-dihomo-linoleoylglycerol (20:2)	1.02094
Lipid	Fatty Acid, Monohydroxy	3-hydroxyoctanoate	1.08041
Lipid	Fatty Acid, Monohydroxy	3-hydroxypalmitate	1.16147
Lipid	Endocannabinoid	oleoyl ethanolamide	0.883694
Lipid	Endocannabinoid	palmitoyl ethanolamide	0.718848
Lipid	Endocannabinoid	N-oleoyltaurine	1
Lipid	Endocannabinoid	N-stearoyltaurine	1.05321
Lipid	Phospholipid Metabolism	1,2-dipalmitoyl-GPC (16:0/16:0)	1.37115
Lipid	Phospholipid Metabolism	1-palmitoyl-2-oleoyl-GPC (16:0/18:1)	1.45278
Lipid	Phospholipid Metabolism	1-palmitoyl-2-linoleoyl-GPC (16:0/18:2)	1.41741
Lipid	Phospholipid Metabolism	1-stearoyl-2-oleoyl-GPC (18:0/18:1)	1.595
Lipid	Phospholipid Metabolism	1,2-dioleoyl-GPC (18:1/18:1)*	1.55216
Lipid	Phospholipid Metabolism	1-palmitoyl-2-arachidonoyl-GPC (16:0/20:4)	1.46754
Lipid	Phospholipid Metabolism	1-stearoyl-2-linoleoyl-GPC (18:0/18:2)*	1.531
Lipid	Phospholipid Metabolism	1-linoleoyl-2-linolenoyl-GPC (18:2/18:3)*	1.12413
Lipid	Phospholipid Metabolism	1-palmitoyl-2-palmitoleoyl-GPC (16:0/16:1)*	1.35243
Lipid	Phospholipid Metabolism	1-oleoyl-2-linoleoyl-GPC (18:1/18:2)*	1.50944
Lipid	Phospholipid Metabolism	1-palmitoyl-2-arachidonoyl-GPE (16:0/20:4)*	1.50265
Lipid	Phospholipid Metabolism	1-palmitoyl-2-linoleoyl-GPE (16:0/18:2)	1.48393
Lipid	Phospholipid Metabolism	1-stearoyl-2-linoleoyl-GPE (18:0/18:2)*	2.00145
Lipid	Phospholipid Metabolism	1-palmitoyl-2-stearoyl-GPC (16:0/18:0)	1.89399
Lipid	Phospholipid Metabolism	1-palmitoyl-2-alpha-linolenoyl-GPC (16:0/18:3n3)*	1.26079
Lipid	Phospholipid Metabolism	1-palmitoleoyl-2-linoleoyl-GPC (16:1/18:2)*	1.66845
Lipid	Phospholipid Metabolism	1,2-dilinoleoyl-GPC (18:2/18:2)	1.48389
Lipid	Phospholipid Metabolism	1,2-dilinoleoyl-GPE (18:2/18:2)*	1.48139
Lipid	Lysolipid	1-palmitoyl-GPC (16:0)	1.2308
Lipid	Lysolipid	1-stearoyl-GPC (18:0)	1.28355
Lipid	Lysolipid	1-oleoyl-GPC (18:1)	1.38926
Lipid	Lysolipid	1-linoleoyl-GPC (18:2)	1.36347
Lipid	Lysolipid	1-lignoceroyl-GPC (24:0)	1.33378
Lipid	Lysolipid	1-stearoyl-GPE (18:0)	1.43092
Lipid	Lysolipid	1-oleoyl-GPE (18:1)	1.37663
Lipid	Lysolipid	1-linoleoyl-GPE (18:2)*	1.29827
Lipid	Plasmalogen	1-(1-enyl-palmitoyl)-2-oleoyl-GPC (P-16:0/18:1)*	1.08522
Lipid	Plasmalogen	1-(1-enyl-palmitoyl)-2-linoleoyl-GPC (P-16:0/18:2)*	1.67173
Lipid	Lysoplasmalogen	1-(1-enyl-palmitoyl)-GPC (P-16:0)*	1.17668
Lipid	Lysoplasmalogen	1-(1-enyl-palmitoyl)-GPE (P-16:0)*	1.20183
Lipid	Lysoplasmalogen	1-(1-enyl-oleoyl)-GPE (P-18:1)*	1.19608
Lipid	Monoacylglycerol	1-palmitoylglycerol (16:0)	1.07057
Lipid	Monoacylglycerol	1-linoleoylglycerol (18:2)	1.1555
Lipid	Monoacylglycerol	1-linolenoylglycerol (18:3)	1.52338
Lipid	Monoacylglycerol	1-docosahexaenoylglycerol (22:6)	1.34533
Lipid	Monoacylglycerol	1-dihomo-linolenylglycerol (20:3)	1.14747
Lipid	Sphingolipid Metabolism	phytosphingosine	0.987978
Lipid	Sphingolipid Metabolism	N-acetylsphingosine	0.552521
Lipid	Primary Bile Acid Metabolism	chenodeoxycholate	0.575468
Nucleotide	Purine Metabolism, (Hypo)Xanthine/Inosine containing	2'-deoxyinosine	0.741
Nucleotide	Purine Metabolism, Adenine containing	adenine	1.0502
Nucleotide	Purine Metabolism, Adenine containing	2'-deoxyadenosine	0.603631
Nucleotide	Pyrimidine Metabolism, Uracil containing	pseudouridine	0.791377
Nucleotide	Pyrimidine Metabolism, Uracil containing	2'-deoxyuridine	0.583133
Nucleotide	Pyrimidine Metabolism, Thymine containing	thymine	0.854962
Cofactors and Vitamins	Riboflavin Metabolism	flavin adenine dinucleotide (FAD)	1.80501
Cofactors and Vitamins	Tocopherol Metabolism	delta-tocopherol	1.20075
Cofactors and Vitamins	Tocopherol Metabolism	gamma-tocopherol/beta-tocopherol	1.11089
Cofactors and Vitamins	Vitamin A Metabolism	retinol (Vitamin A)	0.714666
Xenobiotics	Benzoate Metabolism	3,4-dihydroxybenzoate	0.80563
Xenobiotics	Chemical	sulfate*	0.769648
Summary of the main effect of JB-1 treatment on fecal metabolites levels.Samples were analyzed using GC/LC-MS by Metabolon, Inc. Data were analyzed using two-way ANOVA with contrasts, followed by the Benjamini-Hochberg correction for multiple comparisons (FDR < 0.1). Additional details are provided in Experimental Procedures.

## Sheet: Table S5
Table S5. Fecal metabolites altered by stress (DEF/VEH vs CON/VEH) but unaffected in DEF/JB-1 vs CON/VEH. Related to Figure 5.
Super Pathway	Sub-pathway	Metabolite	Mean Scaled Intensity in CON/VEH ± SD	Mean Scaled Intensity in DEF/JB-1 ± SD	Mean Scaled Intensity in DEF/VEH ± SD
Amino Acid	Lysine Metabolism	glutarate (pentanedioate)	0.8588± 0.3989	1.1421± 0.5441	1.6694± 0.6053
Amino Acid	Phenylalanine and Tyrosine Metabolism	tyramine	1.52± 1.085	1.539± 1.17	0.7486± 0.4821
Amino Acid	Urea cycle: Arginine and Proline Metabolism	N-acetylcitrulline	2.7966± 2.8924	1.2584± 1.2868	0.5431± 0.4807
Carbohydrate	Glycolysis, Gluconeogenesis, and Pyruvate Metabolism	glycerate	1.4014± 0.7765	1.6252± 0.5447	2.0827± 0.5813
Carbohydrate	Disaccharides and Oligosaccharides	lactobionate	1.2688± 0.4012	2.1238± 2.0977	5.2442± 10.0654
Lipid	Fatty Acid Metabolism (Acyl Carnitine)	3-hydroxybutyrylcarnitine (2)	0.8795± 0.3155	0.8191± 0.9963	0.3947± 0.2765
Lipid	Fatty Acid, Monohydroxy	4-hydroxybutyrate (GHB)	0.6713± 0.3389	1.591± 1.843	1.591± 1.112
Lipid	Fatty Acid, Monohydroxy	10-hydroxystearate	0.5619± 0.2018	0.5318± 0.4414	0.3033± 0.1655
Lipid	Sphingolipid Metabolism	stearoyl sphingomyelin (d18:1/18:0)	0.8860± 0.2344	1.4177± 1.0032	1.8429± 0.8086
Lipid	Sphingolipid Metabolism	sphingomyelin (d18:1/24:1, d18:2/24:0)*	0.8767± 0.4969	1.7348± 1.1928	2.4097± 1.1998
Lipid	Sphingolipid Metabolism	behenoyl sphingomyelin (d18:1/22:0)*	0.7665± 0.3955	1.4331± 1.0289	1.7909± 0.7421
Lipid	Sphingolipid Metabolism	sphingomyelin (d18:1/20:0, d16:1/22:0)*	0.5735± 0.3629	1.2559± 1.1085	1.9790± 1.1147
Lipid	Primary Bile Acid Metabolism	alpha-muricholate	0.6263± 0.4049	0.4704± 0.2900	0.3142± 0.2307
Lipid	Secondary Bile Acid Metabolism	lithocholate	0.6566± 0.2543	0.4917± 0.3120	0.3278± 0.2064
Cofactors and Vitamins	Nicotinate and Nicotinamide Metabolism	1-methylnicotinamide	2.695± 3.737	0.5261 ± 0.8623	0.215 ± 0.4037
Summary of fecal metabolites altered by stress but restored to control levels by JB-1 treatment. Samples were analyzed using GC/LC-MS by Metabolon, Inc. Data were analyzed using two-way ANOVA with contrasts, followed by the Benjamini-Hochberg correction for multiple comparisons (FDR < 0.1). Additional details are provided in Experimental Procedures.

## Sheet: Table S6
Table S6. Primer sequences used for real time quantitative PCR. Related to Figure S2
Gene	Access Number	Forward Primer (5' to 3')	Reverse Primer (5' to 3')
GAPDH	NM_001289726	AGCTTGTCATCAACGGGAAG	TTTGATGTTAGTGGGGTCTCG
CRFR1	NM_007762.4	TGGTGGCCTTTGTCCTCTTC	AAAGCCGAGATGAGGTTCCA
CRFR2	NM_001288618	TGATCCACTGGAACCTCATCAC	CATTGCCCTCGTGCACTTC
GR	NM_008173.3	AAAGGTGGCGCTTATGTACTTAGAG	CGTGCGGAGGCTGCAT
GABAAα2	NM_008066.3	CCAAAGATCCTGTCCTCTCTACCA	GGCTTCAGCTGGCTTGTTCT
GABABb1	NM_019439.3	CGAGGTGAATGGCAGTCTGA	CACGGTTTTCCTTCTCCAACA
